# Supplementary material for: Weissella cibaria WIKIM28 ameliorates atopic dermatitis-like skin lesions by inducing tolerogenic dendritic cells and regulatory T cells in BALB/c mice
Source: PubMed Central journal article supplement (PMC5220369; doi:10.1038/srep40040), 2017-01-09
Supplement: srep40040-s1.pdf [file srep40040-s1.pdf]

***Weissella cibaria* WIKIM28 ameliorates atopic dermatitis-like skin lesions by inducing tolerogenic dendritic cells and regulatory T cells in BALB/c mice**

Seul Ki Lim<sup>1†</sup>, Min-Sung Kwon<sup>1†</sup>, Jieun Lee<sup>1</sup>, Young Joon Oh<sup>1</sup>, Ja-Young Jang<sup>1</sup>, Jong-Hee Lee<sup>1</sup>, Hae Woong Park<sup>2</sup>, Young-Do Nam<sup>3</sup>, Myung-Ji Seo<sup>4</sup>, Seong Woon Roh<sup>5</sup>, Hak-Jong Choi<sup>1\*</sup>

<sup>1</sup>Microbiology and Functionality Research Group, World Institute of Kimchi, Gwangju 61755, Republic of Korea

<sup>2</sup>Advanced Process Technology and Fermentation Research Group, World Institute of Kimchi, Gwangju 61755, Republic of Korea

<sup>3</sup>Research Group of Gut Microbiome, Korea Food Research Institute, Seongnam 13539, Republic of Korea

<sup>4</sup>Division of Bioengineering, Incheon National University, Incheon 22012, Republic of Korea

<sup>5</sup>Biological Disaster Analysis Group, Korea Basic Science Institute, Daejeon 34133, Republic of Korea

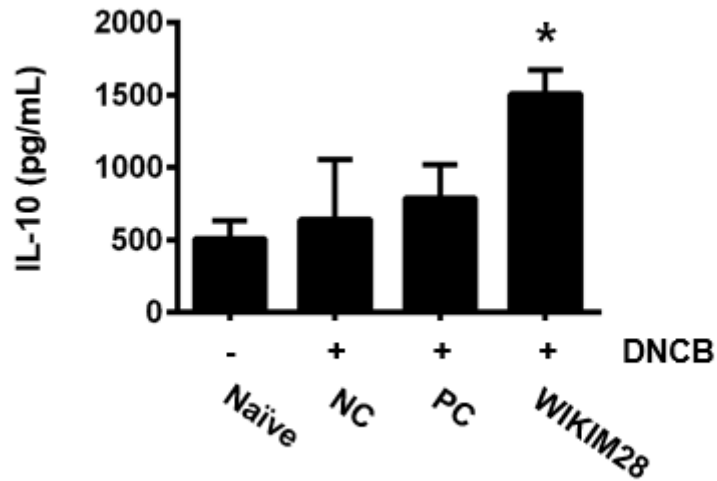

**Supplementary Figure S1. *W. cibaria* WIKIM28 increases the production of IL-10 in splenocytes of DNCB-induced AD mice.**

Splenocytes were re-stimulated with anti-CD3/CD28 mAbs for 1 day, and the levels of IL-10 in the supernatant were measured. Cytokine in the supernatant were detected by a cytometric Bead Array kit. Error bars indicate SE. Data are representative of three independent experiments. \* $p < 0.05$ , compared to the naïve group.

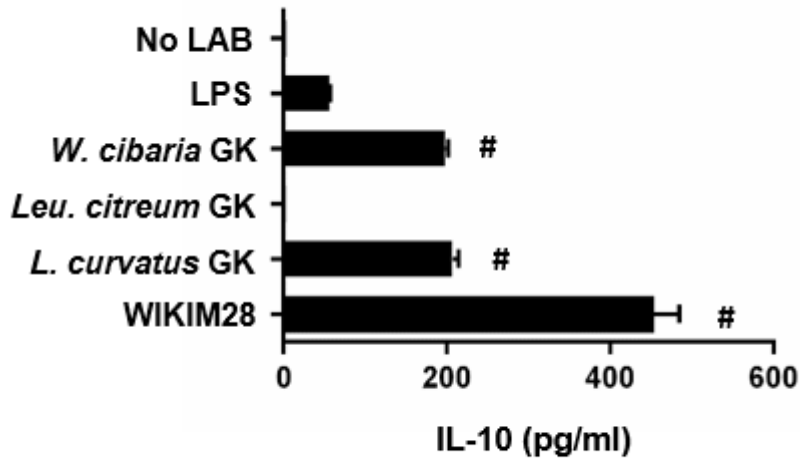

**Supplementary Figure S2. *W. cibaria* WIKIM28 increases the production of IL-10 in BMDCs.**

The release of IL-10 by BMDCs in response to LPS (100 ng/mL) or LAB for 24 h was measured. Cytokines in the supernatant were detected by a Cytometric Bead Array kit. Error bars indicate SE. Data are representative of three independent experiments.  $^{\#}p < 0.001$ , compared to the negative control group (No LAB). *W. cibaria* WIKIM28 was compared with LAB isolates isolated from gatkimchi (GK) (*W. cibaria* GK, *Weissella cibaria*; *Leu. citreum* GK, *Leuconostoc citreum*; *L. curvatus* GK, *Lactobacillus curvatus*).
